# Supplementary material
Source: PubMed Central journal article supplement (PMC3924722)
Supplement: NIHMS551004-supplement-supplemental.pdf [file NIHMS551004-supplement-supplemental.pdf]

## Supplemental Material

### I: Proof of Theorem 3

There are some notation changes as follows for the convenience of the derivation:

we use  $b_{Y_1} = \beta_{1,l+1}$ ,  $b_{Y_2} = \beta_{2,l+1}$ ,  $\dots$ ,  $b_{Y_n} = \beta_{l,l+1}$ ,  $b_{Z_1} = \beta_{l+3,l+2}$ ,  $b_{Z_2} = \beta_{l+4,l+2}$ ,  $\dots$ ,  
 $b_{Z_{\tilde{m}}} = \beta_{l+m,l+2}$ ,  $b_{21} = \beta_{l+1,l+2}$ ,  $Y_1 = X_1$ ,  $Y_2 = X_2$ ,  $\dots$ ,  $Y_n = X_l$ ,  $Z_1 = X_{l+3}$ ,  $Z_2 =$   
 $X_{l+4}$ ,  $\dots$ ,  $Z_{\tilde{m}} = X_{l+m}$ ,  $X_1 = X_{l+1}$ ,  $X_2 = X_{l+2}$ . Finally, we use  $m$  instead of  $\tilde{m}$ .

Based on Wright's second decomposition rule [56], the covariance matrix of all the variables,  $T_{n,m}$ , can be represented as a function of the parameters of the BN, i.e.,

$$T_{n,m} = \text{Cov}(Y_1, Y_2, \dots, Y_n, X_1, X_2, Z_1, Z_2, \dots, Z_m) = \begin{pmatrix} 1 & 0 & 0 & \dots & 0 & b_{Y_1} & b_{21}b_{Y_1} & 0 & 0 & \dots & 0 \\ 0 & 1 & 0 & \dots & 0 & b_{Y_2} & b_{21}b_{Y_2} & 0 & 0 & \dots & 0 \\ 0 & 0 & 1 & \dots & 0 & b_{Y_3} & b_{21}b_{Y_3} & 0 & 0 & \dots & 0 \\ \dots & \dots \\ 0 & 0 & 0 & \dots & 1 & b_{Y_n} & b_{21}b_{Y_n} & 0 & 0 & \dots & 0 \\ b_{Y_1} & b_{Y_2} & b_{Y_3} & \dots & b_{Y_n} & 1 & b_{21} & 0 & 0 & \dots & 0 \\ b_{21}b_{Y_1} & b_{21}b_{Y_2} & b_{21}b_{Y_3} & \dots & b_{21}b_{Y_n} & b_{21} & 1 & b_{Z_1} & b_{Z_2} & \dots & b_{Z_m} \\ 0 & 0 & 0 & \dots & 0 & 0 & b_{Z_1} & 1 & 0 & \dots & 0 \\ 0 & 0 & 0 & \dots & 0 & 0 & b_{Z_2} & 0 & 1 & \dots & 0 \\ \dots & \dots \\ 0 & 0 & 0 & \dots & 0 & 0 & b_{Z_m} & 0 & 0 & \dots & 1 \end{pmatrix} \quad (\text{A-1}).$$

Now, consider the regression of  $X_1$  on all other variables, i.e.,  $X_1 = b_{Y_1}^{MB}Y_1 + b_{Y_2}^{MB}Y_2 + \dots + b_{Y_n}^{MB}Y_n + b_{Z_1}^{MB}Z_1 + b_{Z_2}^{MB}Z_2 + \dots + b_{Z_m}^{MB}Z_m + b_{21}^{MB}X_2 + e_{X_1}^{MB}$ . According to the Least Square criterion, the regression coefficients are equal to

$$\begin{pmatrix} b_{Y_1}^{MB} \\ b_{Y_2}^{MB} \\ \dots \\ b_{Y_n}^{MB} \\ b_{Z_1}^{MB} \\ b_{Z_2}^{MB} \\ \dots \\ b_{Z_m}^{MB} \end{pmatrix} = \begin{pmatrix} 1 & 0 & \dots & 0 & b_{21}b_{Y_1} & 0 & 0 & \dots & 0 \\ 0 & 1 & \dots & 0 & b_{21}b_{Y_2} & 0 & 0 & \dots & 0 \\ \dots & \dots \\ 0 & 0 & \dots & 1 & b_{21}b_{Y_n} & 0 & 0 & \dots & 0 \\ b_{21}b_{Y_1} & b_{21}b_{Y_2} & \dots & b_{21}b_{Y_n} & 1 & b_{Z_1} & b_{Z_2} & \dots & b_{Z_m} \\ 0 & 0 & \dots & 0 & b_{Z_1} & 1 & 0 & \dots & 0 \\ 0 & 0 & \dots & 0 & b_{Z_2} & 0 & 1 & \dots & 0 \\ \dots & \dots \\ 0 & 0 & \dots & 0 & b_{Z_m} & 0 & 0 & \dots & 1 \end{pmatrix}^{-1} \begin{pmatrix} b_{Y_1} \\ b_{Y_2} \\ \dots \\ b_{Y_n} \\ b_{Z_1} \\ b_{Z_2} \\ \dots \\ 0 \end{pmatrix} \quad (\text{A-2})$$

Denote the first matrix in the right hand side of the equation as  $A_{n,m}$ , and its inverse matrix as  $C_{n,m}$ , with  $A_{n,m} = (a_{i,j})_{i=1,2,\dots,n;j=1,2,\dots,m}$ ,  $C_{n,m} = (c_{i,j})_{i=1,2,\dots,n;j=1,2,\dots,m}$ . We first investigate the formula for  $b_{y_1}^{MB}$ . Based on (A-2), we have

$$b_{y_1}^{MB} = a_{11}b_{y_1} + a_{12}b_{y_2} + a_{13}b_{y_3} + \dots + a_{1n}b_{y_n} + a_{1n+1}b_{Z_1}. \quad (\text{A-3})$$

Our final objective is to express  $b_{y_1}^{MB}$  by the parameters of the BN. This can be achieved if we can express  $a_{11}, a_{12}, a_{13}, \dots, a_{1n+1}$  by the parameters of the BN, which is the goal of the following derivation.

It is known that

$$a_{i,j,n,m} = (-1)^{i+j} \frac{\det(\mathbf{C}_{j,i,n,m})}{\det(\mathbf{C}_{n,m})}, \quad (\text{A-4})$$

where  $\mathbf{C}_{j,i,n,m}$  is a matrix by deleting the  $i^{\text{st}}$  row and the  $j^{\text{th}}$  column from  $\mathbf{C}_{n,m}$ . So, the problem becomes calculation of  $\det(\mathbf{C}_{j,i,n,m})$  and  $\det(\mathbf{C}_{n,m})$ .

(i) Calculation of  $\det(\mathbf{C}_{n,m})$ :

We first show the result:

$$\det(\mathbf{C}_{n,m}) = 1 - \sum_{i=1}^m b_{Z_i}^2 - b_{21}^2 \sum_{i=1}^n b_{Y_i}^2. \quad (\text{A-5})$$

Next, we will use the induction method in 1)-3) below to prove (A-5):

1) When  $n = 1$ , for any fixed  $m$ , it is easy to see that (A-5) holds.

2) Assume that (A-5) holds for  $n - 1$ , i.e.,  $\det(\mathbf{C}_{n-1,m}) = 1 - \sum_{i=1}^m b_{Z_i}^2 - b_{21}^2 \sum_{i=1}^{n-1} b_{Y_i}^2$  for any fixed

$m$ . Then we need prove that (A-5) holds for  $n$ . We apply the Leibniz formula on the first

row of  $\det(\mathbf{C}_{n,m})$ :

$$\det(\mathbf{C}_{n,m}) = 1 \times \det \begin{pmatrix} 1 & 0 & \dots & 0 & b_{21}b_{Y_2} & 0 & 0 & \dots & 0 \\ 0 & 1 & \dots & 0 & b_{21}b_{Y_3} & 0 & 0 & \dots & 0 \\ \dots & \dots \\ 0 & 0 & \dots & 1 & b_{21}b_{Y_n} & 0 & 0 & \dots & 0 \\ b_{21}b_{Y_2} & b_{21}b_{Y_3} & \dots & b_{21}b_{Y_n} & 1 & b_{Z_1} & b_{Z_2} & \dots & b_{Z_m} \\ 0 & 0 & \dots & 0 & b_{Z_1} & 1 & 0 & \dots & 0 \\ 0 & 0 & \dots & 0 & b_{Z_2} & 0 & 1 & \dots & 0 \\ \dots & \dots \\ 0 & 0 & \dots & 0 & b_{Z_m} & 0 & 0 & \dots & 1 \end{pmatrix} + (-1)^{n+2} \times b_{21}b_{Y_1} \times \begin{pmatrix} 0 & 1 & 0 & \dots & 0 & 0 & 0 & \dots & 0 \\ 0 & 0 & 1 & \dots & 0 & 0 & 0 & \dots & 0 \\ \dots & \dots \\ \dots & \dots \\ 0 & 0 & 0 & \dots & 1 & 0 & 0 & \dots & 0 \\ b_{21}b_{Y_1} & b_{21}b_{Y_2} & b_{21}b_{Y_3} & \dots & b_{21}b_{Y_n} & b_{Z_1} & b_{Z_2} & \dots & b_{Z_m} \\ 0 & 0 & 0 & \dots & 0 & 1 & 0 & \dots & 0 \\ 0 & 0 & 0 & \dots & 0 & 0 & 1 & \dots & 0 \\ \dots & \dots \\ 0 & 0 & 0 & \dots & 0 & 0 & 0 & \dots & 1 \end{pmatrix}$$

It is easy to see

$$\det \begin{pmatrix} 0 & 1 & 0 & \dots & 0 & 0 & 0 & \dots & 0 \\ 0 & 0 & 1 & \dots & 0 & 0 & 0 & \dots & 0 \\ \dots & \dots \\ 0 & 0 & 0 & \dots & 1 & 0 & 0 & \dots & 0 \\ b_{21}b_{Y_1} & b_{21}b_{Y_2} & b_{21}b_{Y_3} & \dots & b_{21}b_{Y_n} & b_{Z_1} & b_{Z_2} & \dots & b_{Z_m} \\ 0 & 0 & 0 & \dots & 0 & 1 & 0 & \dots & 0 \\ 0 & 0 & 0 & \dots & 0 & 0 & 1 & \dots & 0 \\ \dots & \dots \\ 0 & 0 & 0 & \dots & 0 & 0 & 0 & \dots & 1 \end{pmatrix} = (-1)^{n+1} \times b_{21}b_{Y_1}$$

Thus, we get

$$\det(\mathbf{C}_{n,m}) = 1 - \sum_{i=1}^m b_{Z_i}^2 - b_{21}^2 \sum_{i=2}^n b_{Y_i}^2 + (-1)^{n+2} \times b_{21}b_{Y_1} \times (-1)^{n+1} \times b_{21}b_{Y_1} = 1 - \sum_{i=1}^m b_{Z_i}^2 - b_{21}^2 \sum_{i=1}^n b_{Y_i}^2.$$

3) We show that the same induction method above can be applied to prove that (A-5) also holds for  $m$ , for any fixed  $n$ . This can be validated by the observation that

$$\det(\mathbf{C}_{n,m}) = \det \begin{pmatrix} 1 & 0 & \dots & 0 & b_{21}b_{Y_1} & 0 & 0 & \dots & 0 \\ 0 & 1 & \dots & 0 & b_{21}b_{Y_2} & 0 & 0 & \dots & 0 \\ \dots & \dots \\ 0 & 0 & \dots & 1 & b_{21}b_{Y_n} & 0 & 0 & \dots & 0 \\ b_{21}b_{Y_1} & b_{21}b_{Y_2} & \dots & b_{21}b_{Y_n} & 1 & b_{21}\frac{b_{Z_1}}{b_{21}} & b_{21}\frac{b_{Z_2}}{b_{21}} & \dots & b_{21}\frac{b_{Z_m}}{b_{21}} \\ 0 & 0 & \dots & 0 & b_{21}\frac{b_{Z_1}}{b_{21}} & 1 & 0 & \dots & 0 \\ 0 & 0 & \dots & 0 & b_{21}\frac{b_{Z_2}}{b_{21}} & 0 & 1 & \dots & 0 \\ \dots & \dots \\ 0 & 0 & \dots & 0 & b_{21}\frac{b_{Z_m}}{b_{21}} & 0 & 0 & \dots & 1 \end{pmatrix}$$

where  $\{b_{Y_1}, b_{Y_2}, \dots, b_{Y_n}\}$  and  $\left\{\frac{b_{Z_1}}{b_{21}}, \frac{b_{Z_2}}{b_{21}}, \dots, \frac{b_{Z_m}}{b_{21}}\right\}$  is symmetrical.

(ii) Calculation of  $\det(\mathbf{C}_{1,j,n,m})$  for  $j = 1, 2, \dots, n$ :

Using the Leibniz formula again, on the  $j-1^{\text{st}}$  row of  $\mathbf{C}_{1,j,n,m}$ , we get

$$\det(\mathbf{C}_{1,j,n,m}) = \det \begin{pmatrix} 0 & 1 & \dots & 0 & 0 & \dots & 0 & b_{21}b_{Y_2} & 0 & 0 & \dots & 0 \\ 0 & 0 & \dots & 0 & 0 & \dots & 0 & b_{21}b_{Y_3} & 0 & 0 & \dots & 0 \\ \dots & \dots \\ 0 & 0 & \dots & 1 & 0 & \dots & 0 & b_{21}b_{Y_{j-1}} & 0 & 0 & \dots & 0 \\ 0 & 0 & \dots & 0 & 0 & \dots & 0 & b_{21}b_{Y_j} & 0 & 0 & \dots & 0 \\ 0 & 0 & \dots & 0 & 1 & \dots & 0 & b_{21}b_{Y_{j+1}} & 0 & 0 & \dots & 0 \\ \dots & \dots \\ 0 & 0 & \dots & 0 & 0 & \dots & 1 & b_{21}b_{Y_n} & 0 & 0 & \dots & 0 \\ b_{21}b_{Y_1} & b_{21}b_{Y_2} & \dots & b_{21}b_{Y_{j-1}} & b_{21}b_{Y_{j+1}} & \dots & b_{21}b_{Y_n} & 1 & b_{Z_1} & b_{Z_2} & \dots & b_{Z_m} \\ 0 & 0 & \dots & 0 & 0 & \dots & 0 & b_{Z_1} & 1 & 0 & \dots & 0 \\ \dots & \dots \\ 0 & 0 & \dots & 0 & 0 & \dots & 0 & b_{Z_m} & 0 & 0 & \dots & 1 \end{pmatrix}$$

After some permutations, we get

$$\det(\mathbf{C}_{1,j,n,m}) = (-1)^{j-1} \times b_{21}^2 b_{Y_j} b_{Y_1} \quad (\text{A-6})$$

(iii) Calculation of  $\det(\mathbf{C}_{1,j,n,m})$  for  $j = n + 1$ : through some permutation of the matrix, it is straightforward to get

$$\det(\mathbf{C}_{1,n+1,n,m}) = (-1)^{n-1} b_{21} b_{Y_1}, \quad (\text{A-7})$$

Inserting (A-5), (A-6), and (A-7) into (A-4), we get:

$$\begin{aligned} a_{11} &= \frac{1 - \sum_{i=1}^m b_{Z_i}^2 - b_{21}^2 \sum_{i=2}^n b_{Y_i}^2}{1 - \sum_{i=1}^m b_{Z_i}^2 - b_{21}^2 \sum_{i=1}^n b_{Y_i}^2} \\ a_{1j} &= \frac{b_{21}^2 b_{Y_1} b_{Y_j}}{1 - \sum_{i=1}^m b_{Z_i}^2 - b_{21}^2 \sum_{i=1}^n b_{Y_i}^2}, \quad j = 2, 3, \dots, n; \\ a_{1,n+1} &= \frac{-b_{21} b_{Y_1}}{1 - \sum_{i=1}^m b_{Z_i}^2 - b_{21}^2 \sum_{i=1}^n b_{Y_i}^2} \end{aligned} \quad (\text{A-8})$$

Inserting (A-8) into (A-3), we get

$$b_{y_1}^{MB} = b_{y_1} \frac{1 - \sum_{i=1}^m b_{Z_i}^2 - b_{21}^2}{1 - \sum_{i=1}^m b_{Z_i}^2 - b_{21}^2 \sum_{i=1}^n b_{Y_i}^2}.$$

Due to the symmetry between  $\{b_{Y_1}, b_{Y_2}, \dots, b_{Y_n}\}$ , we get

$$b_{y_i}^{MB} = b_{Y_i} \frac{1 - \sum_{i=1}^m b_{Z_i}^2 - b_{21}^2}{1 - \sum_{i=1}^m b_{Z_i}^2 - b_{21}^2 \sum_{i=1}^n b_{Y_i}^2}, \quad (\text{A-9})$$

Obviously, the fraction at the right-hand side is between 0 and 1. Therefore,  $\left| b_{y_i}^{MB} \right| < \left| b_{Y_i} \right|$ .

Next we derive the formula for  $b_{Y_i}^{MB} / se(b_{Y_i}^{MB})$ . It is known that

$se^2(b_{Y_i}^{MB}) = a_{11} / ((n-1)(T_{n,m}^{-1})_{11})$ . Since  $(T_{n,m}^{-1})_{11} = \det(T_{1,1,n,m}) / \det(T_{n,m})$ , the problem

becomes the calculation of  $\det(T_{1,1,n,m})$  and  $\det(T_{n,m})$ . Using the similar method for the

calculation of  $\det(C_{j,i,n,m})$  and  $\det(C_{n,m})$ , we can get

$$\det(T_{n,m}) = 1 - \sum_{i=1}^n \left[ b_{Y_i}^2 \left( 1 - b_{21}^2 - \sum_{j=1}^m b_{Z_j}^2 \right) \right] \quad \text{and} \quad \det(T_{1,1,n,m}) = 1 - \sum_{i=2}^n \left[ b_{Y_i}^2 \left( 1 - b_{21}^2 - \sum_{j=1}^m b_{Z_j}^2 \right) \right].$$

Hence,

we

get

$$se_n^2(b_{Y_i}^{MB}) = \frac{1}{n-1} \frac{\det(T_{1,1,n,m})}{\det(T_{n,m})} a_{11} = \frac{1}{n-1} \frac{1 - \sum_{i=2}^n \left[ b_{Y_i}^2 \left( 1 - b_{21}^2 - \sum_{j=1}^m b_{Z_j}^2 \right) \right]}{1 - \sum_{i=1}^n \left[ b_{Y_i}^2 \left( 1 - b_{21}^2 - \sum_{j=1}^m b_{Z_j}^2 \right) \right]} \frac{1 - \sum_{i=1}^m b_{Z_i}^2 - b_{21}^2 \sum_{i=2}^n b_{Y_i}^2}{1 - \sum_{i=1}^m b_{Z_i}^2 - b_{21}^2 \sum_{i=1}^n b_{Y_i}^2}.$$

Together with  $se_n^2(b_{Y_i}) = \frac{1 - \sum_{i=1}^n b_{Y_i}^2}{n-1}$ , we now have

$$\frac{b_{Y_i}^{MB}}{se_n(b_{Y_i}^{MB})} = \frac{b_{Y_i}}{se_n(b_{Y_i})} \frac{1 - \sum_{i=1}^m b_{Z_i}^2 - b_{21}^2}{1 - \sum_{i=1}^m b_{Z_i}^2 - b_{21}^2 \sum_{i=1}^n b_{Y_i}^2} \sqrt{1 - \sum_{i=1}^n b_{Y_i}^2} \left/ \sqrt{\frac{1 - \sum_{i=2}^n \left[ b_{Y_i}^2 \left( 1 - b_{21}^2 - \sum_{j=1}^m b_{Z_j}^2 \right) \right]}{1 - \sum_{i=1}^n \left[ b_{Y_i}^2 \left( 1 - b_{21}^2 - \sum_{j=1}^m b_{Z_j}^2 \right) \right]} \frac{1 - \sum_{i=1}^m b_{Z_i}^2 - b_{21}^2 \sum_{i=2}^n b_{Y_i}^2}{1 - \sum_{i=1}^m b_{Z_i}^2 - b_{21}^2 \sum_{i=1}^n b_{Y_i}^2}} \right.$$

Since

$$\sqrt{\frac{1 - \sum_{i=2}^n \left[ b_{Y_i}^2 \left( 1 - b_{21}^2 - \sum_{j=1}^m b_{Z_j}^2 \right) \right]}{1 - \sum_{i=1}^n \left[ b_{Y_i}^2 \left( 1 - b_{21}^2 - \sum_{j=1}^m b_{Z_j}^2 \right) \right]}} \frac{1 - \sum_{i=1}^m b_{Z_i}^2 - b_{21}^2 \sum_{i=2}^n b_{Y_i}^2}{1 - \sum_{i=1}^m b_{Z_i}^2 - b_{21}^2 \sum_{i=1}^n b_{Y_i}^2} > 1, \quad \sqrt{1 - \sum_{i=1}^n b_{Y_i}^2} < 1 \quad \text{and}$$

$$\frac{1 - \sum_{i=1}^m b_{Z_i}^2 - b_{21}^2}{1 - \sum_{i=1}^m b_{Z_i}^2 - b_{21}^2 \sum_{i=1}^n b_{Y_i}^2} < 1, \quad \text{we get } \frac{b_{Y_i}^{MB}}{se_n(b_{Y_i}^{MB})} < \frac{b_{Y_i}}{se_n(b_{Y_i})}.$$

## II: Effective connectivity models of AD and NC using BIC for selecting $\lambda_1$

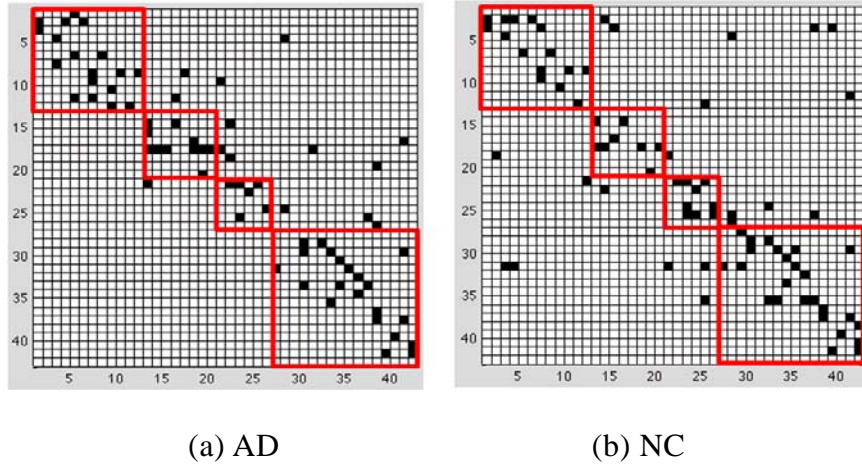

Fig. S-1: Effective connectivity models learned by SBN, with  $\lambda_1$  selected to minimize BIC

## III: Effective connectivity models of AD and NC by controlling the total numbers of arcs to be the same

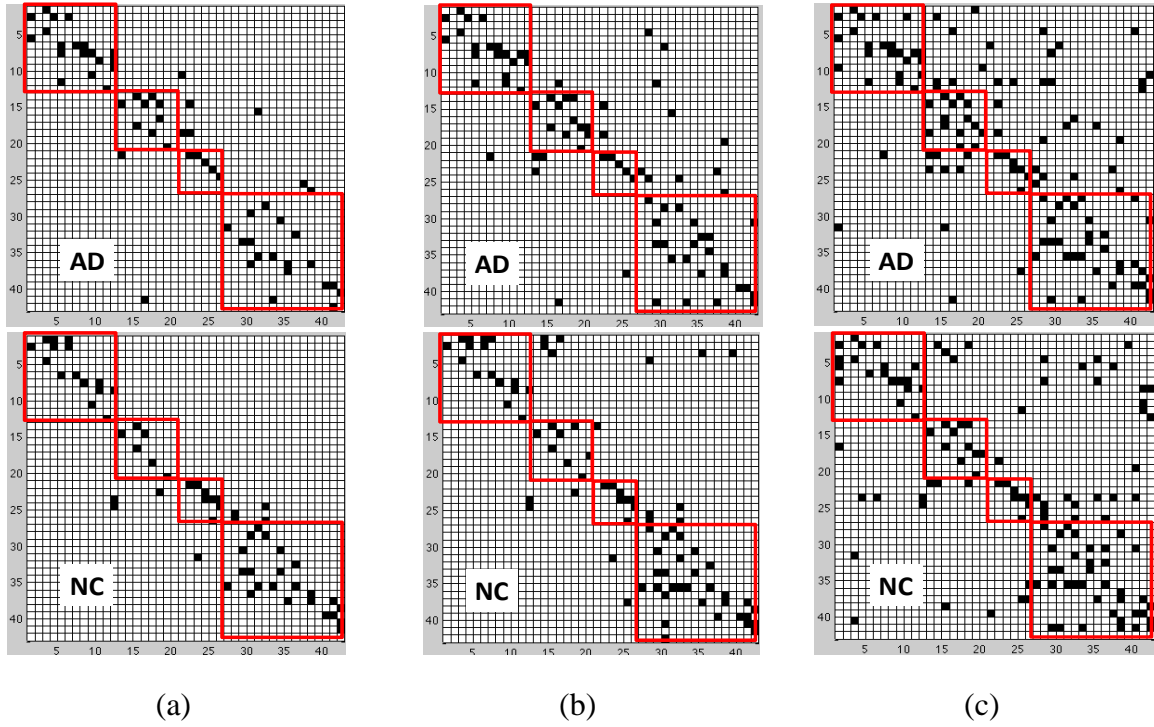

Fig. S-2: (a)-(c): Effective connectivity models with the total number of arcs = 60, 80, 120.

#### IV: PDAGs of AD and NC

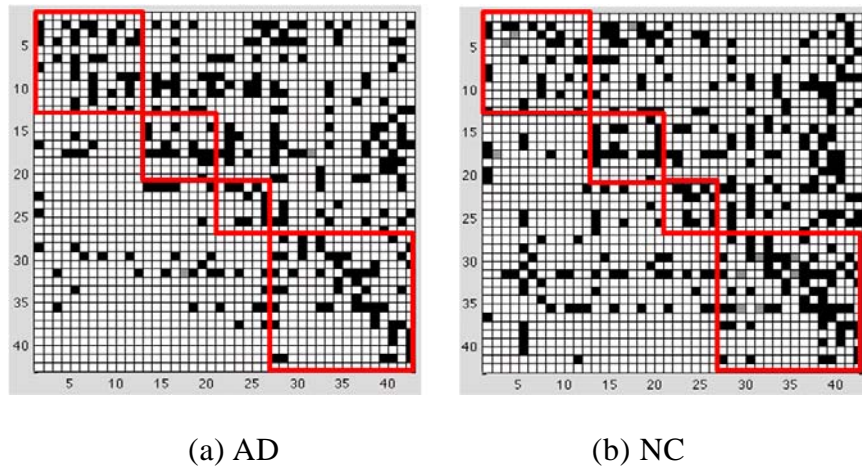

Fig S-3: PDAGs learned by SBN, with  $\lambda_1$  selected to minimize the prediction error (a black cell represents a directed arc; a gray cell represents an undirected arc)



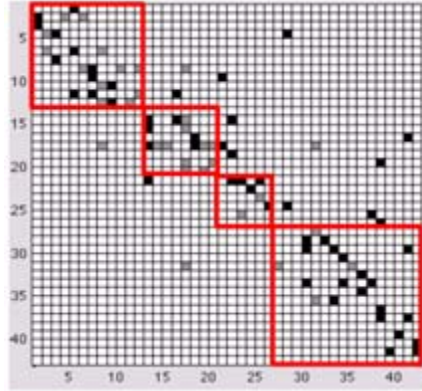

(a) AD

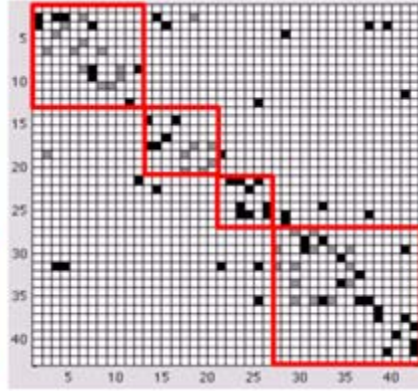

(b) NC

Fig. S-4: PDAGs learned by SBN, with  $\lambda_1$  selected to minimize BIC
